# Supplementary material for: Overcoming barriers in long-term, continuous monitoring of soil CO 2 flux: A low-cost sensor system
Source: Copernicus journal article supplement (doi:10.5194/egusphere-2024-3156), 2024-11-07
Supplement: Supplementary file 1 [file egusphere-2024-3156-supplement.pdf]

## Supplementary information

### 1. Supplementary materials and methods

#### 1.1. Hardware

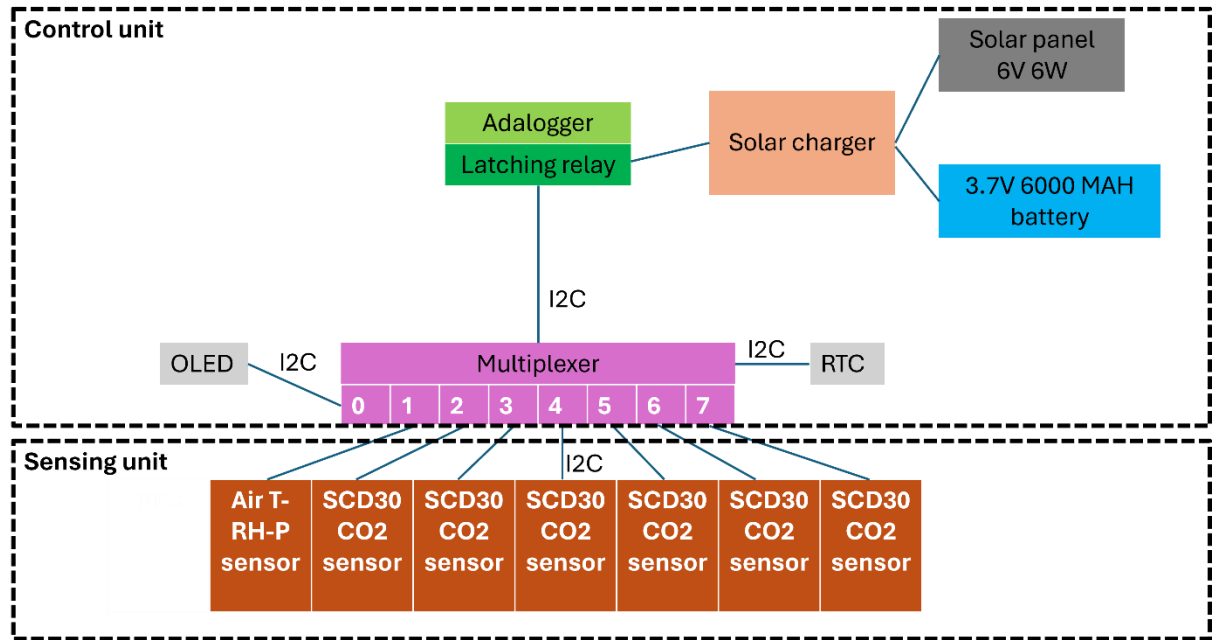

**Figure S1:** The schematic design of the LC-SS with the control unit and the sensing unit.

#### 1.2. $F_{GM}$ calculation

The low-cost CO<sub>2</sub> sensors are factory pre-calibrated at fixed pressure and temperature. **Eq. S1** is applied to correct soil CO<sub>2</sub> concentration to in-situ environmental field conditions according to ideal gas law (e.g., Chamizo et al., 2022).

$$C_v = C_{v0} \frac{P_c(273.2 + T_s)}{P_s(273.2 + T_c)} \quad [S1]$$

where  $C_v$  [ $\mu\text{mol mol}^{-1}$  or ppm] is the corrected soil CO<sub>2</sub> concentration,  $P_c$  [hPa] is the atmospheric pressure during factory calibration ( $P_c = 1013$  hPa),  $P_s$  [hPa] is the air pressure in soil (assume  $P_s =$  atmospheric pressure),  $T_c$  [ $^{\circ}\text{C}$ ] is the air temperature during factory calibration ( $T_c = 25$   $^{\circ}\text{C}$ ), and  $T_s$  is the soil temperature measured by the CO<sub>2</sub> sensors.

The CO<sub>2</sub> concentration or volume fraction ( $C_v$  [ $\mu\text{mol mol}^{-1}$  or ppm]) is converted to mole density ( $C_z$  [ $\mu\text{mol m}^{-3}$ ]) by **Eq. S2**.

$$C_z = \frac{C_v * 1000}{22.41} \quad [S2]$$

To correct  $D_a$  to in-situ environmental conditions before using it in **Eq. 2** (Johns, 2013), **Eq. S3** is applied:

$$D_a = D_{a0} \left( \frac{T_a}{T_0} \right)^{1.75} \left( \frac{P_0}{P_a} \right) \quad [\text{S3}]$$

where  $T_a$  [K] is the in-situ air temperature,  $P_a$  [hPa] is the in-situ air pressure, and  $D_{a0}$  [ $\text{m}^2 \text{s}^{-1}$ ] is the reference value of  $D_a$  at  $T_0$  (293.15 K) and  $P_0$  (1013 hPa) equals to  $1.47 \times 10^{-5} \text{ m}^2 \text{ s}^{-1}$ .

Total soil porosity ( $\Phi$ ) equals the sum of the volumetric air content ( $\varepsilon$ ) and the volumetric water content ( $\theta$ ). Soil porosity is calculated using **Eq. S4**.

$$\Phi = 1 - \frac{\rho_b}{\rho_m} = \varepsilon + \theta \quad [\text{S4}]$$

where  $\rho_b$  [ $\text{g cm}^{-3}$ ] is the bulk density and  $\rho_m$  [ $\text{g cm}^{-3}$ ] is the particle density for the mineral soil ( $\rho_m = 2.65 \text{ g cm}^{-3}$ ).

## 2. Supplementary results

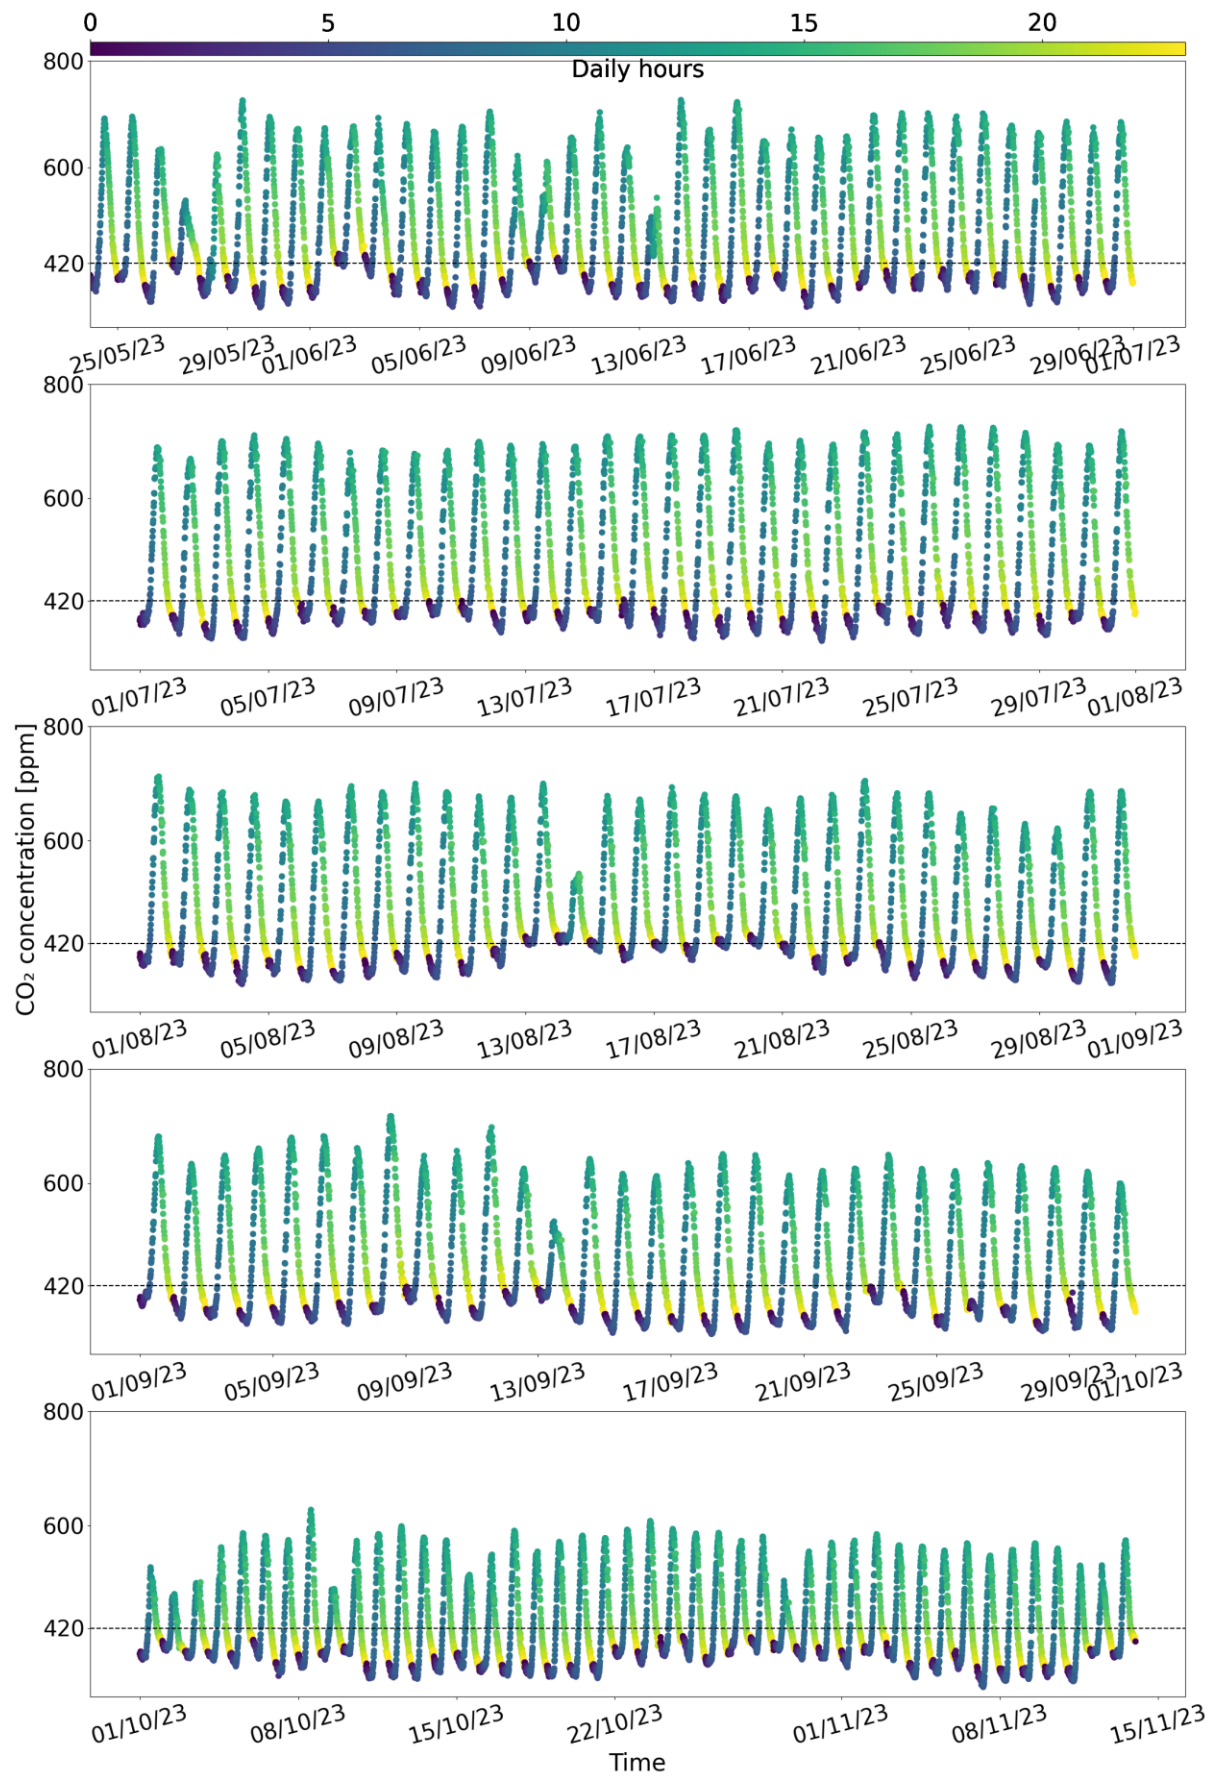

**Figure S2.** Soil CO<sub>2</sub> concentrations at 5 cm during the entire study period.

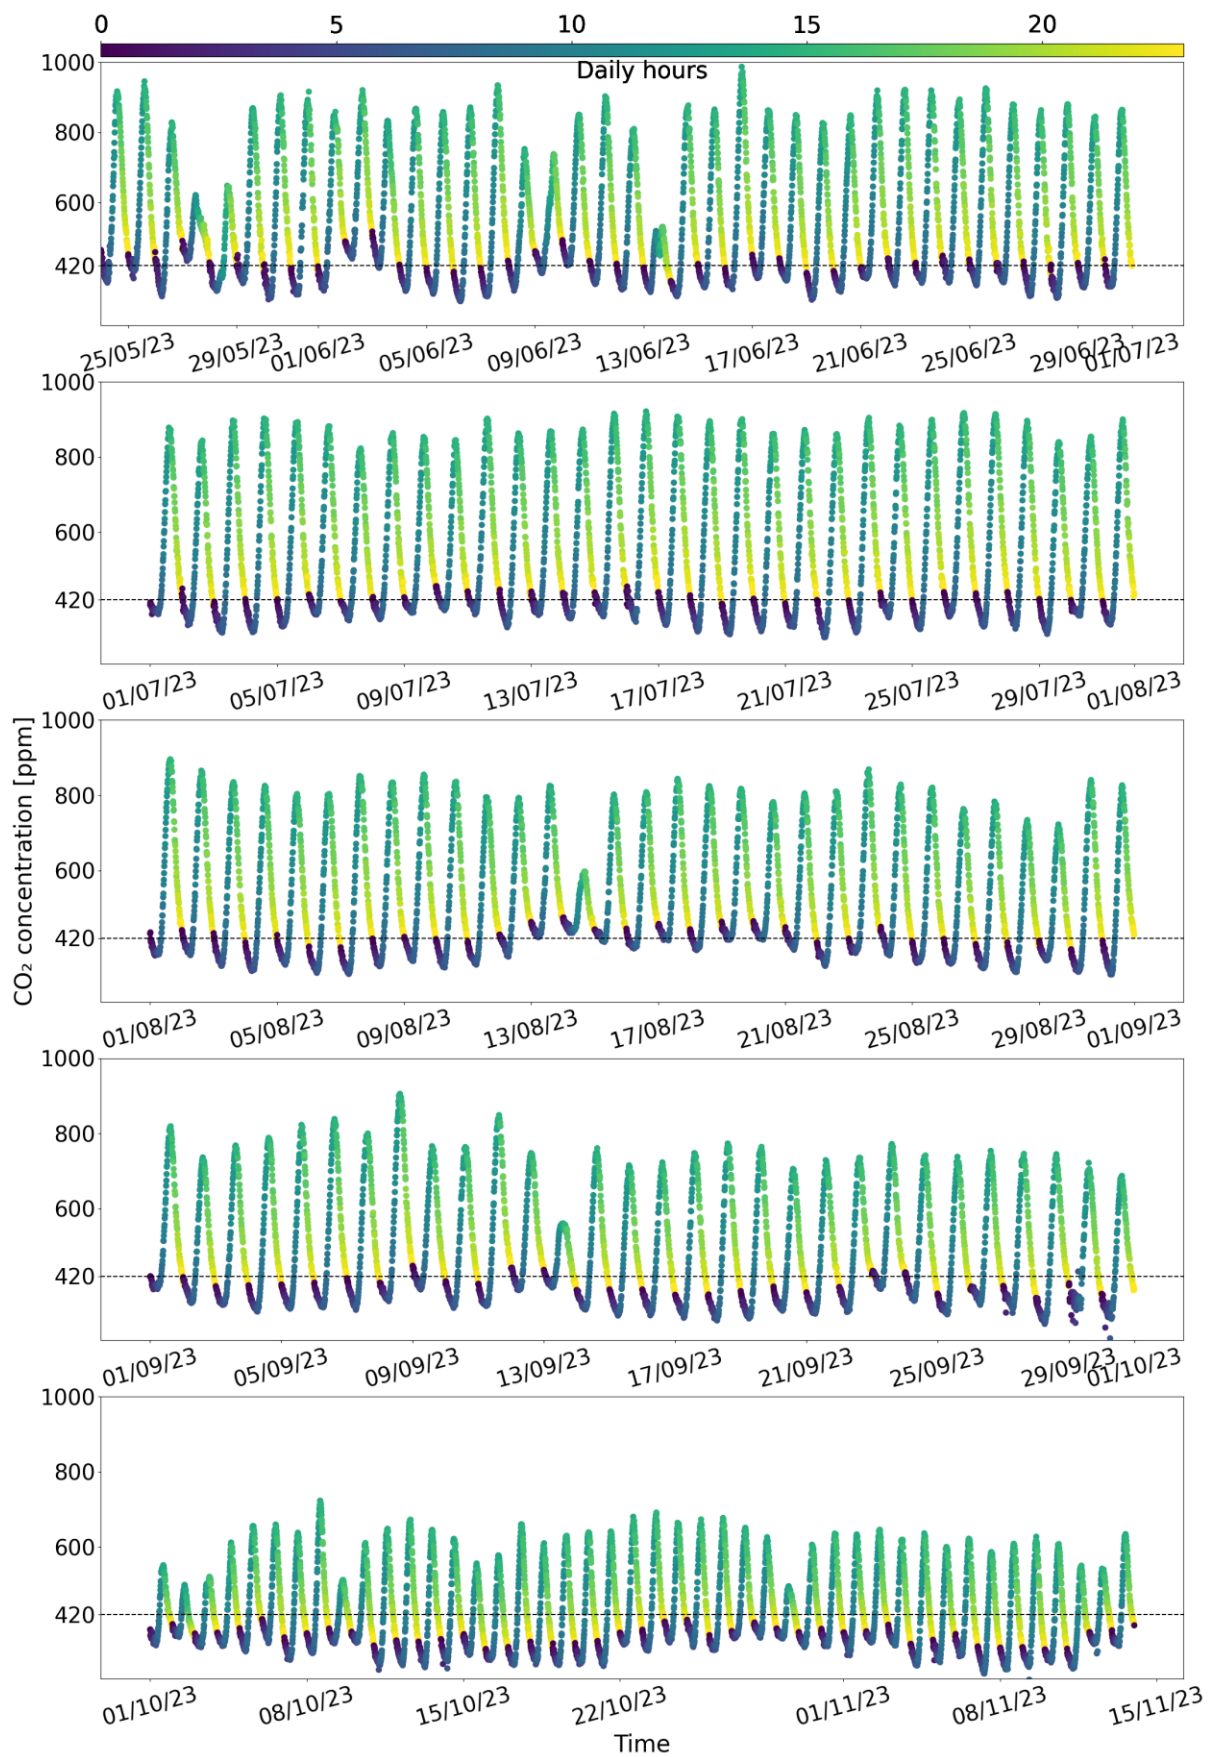

**Figure S3.** Soil CO<sub>2</sub> concentrations at 10 cm during the entire study period.
