# Supplementary material for: Overcoming barriers in long-term, continuous monitoring of soil CO 2 flux: A low-cost sensor system
Source: Copernicus journal article supplement (doi:10.5194/egusphere-2024-3156), 2024-11-07
Supplement: Supplementary file [file egusphere-2024-3156-AC1-supplement.pdf]

Dear Hirohiko Nagano,

Thank you for your interest in our work.

We would like to answer your questions as follows:

1. *"I have a question regarding the relationship between the diffusion coefficients obtained from the ratio of measured CO<sub>2</sub> flux to CO<sub>2</sub> conc gradient and from the model. I am unsure, but such evaluation may contribute to considering the limitations and further improving the novel measurement system. What is the relationship between those two diffusion coefficients?"*

We agree that in general, estimating diffusion coefficients obtained from measured CO<sub>2</sub> flux and CO<sub>2</sub> concentration gradient is a good approach as recommended by, for example, Sánchez-Cañete et al., (2017, 2018).

$D_s$  (in situ CO<sub>2</sub> diffusion coefficient [ $\text{m}^2 \text{s}^{-1}$ ]) can be calculated as (e.g., Sánchez-Cañete et al., 2018):

$$D_s = -\frac{F_{chamber} \cdot \Delta z}{\Delta C} \quad (1)$$

where:

- $F_{chamber}$  is surface flux measured by chamber method
- $\Delta z = 0.05$  m in our case
- $\Delta C$  is gradient of CO<sub>2</sub> molar density

The calculated  $D_s$  will be used to optimize a diffusion model specific to the soil of the research site (e.g., Sánchez-Cañete et al., 2018).

$$\frac{D_s}{D_a} = a\theta_a^b \quad (2)$$

where:

- $D_a$  is the diffusion coefficient of CO<sub>2</sub> in free air [ $\text{m}^2 \text{s}^{-1}$ ]
- $\theta_a$  is the soil air porosity ( $\theta_a = \text{soil porosity} - \text{SWC}$ , where SWC is soil water content)
- $a$  and  $b$  are fitting coefficients.

While this approach is theoretically sound, its practical application is sometimes challenging due to limitations in accurately measuring  $\theta_a$ . To obtain reliable  $\theta_a$ , reliable SWC measurements are required. However, in our hyper-arid soil (aridity index = 0.07), SWC remains consistently below 5%, which is outside the accuracy range of available moisture sensors. Consequently,  $\theta_a$ , also suffers from low accuracy. This inaccuracy prevents us from capturing the real-time fluctuations of  $\theta_a$ , leading to unreliable estimates of  $a$  and  $b$  when optimizing the diffusion model.

Since improving the accuracy of gradient flux calculations is not the focus of this work, we have not discussed this aspect in detail. However, as requested, Figure 1 below compares  $D_s$  values obtained using the chamber-based method ( $F_{chamber}$  and  $\Delta C$ , labeled as  $D_{chamber}$ ) with those derived from the Buckingham model (Buckingham, 1904) (labeled as  $D_{Buckingham}$ ).

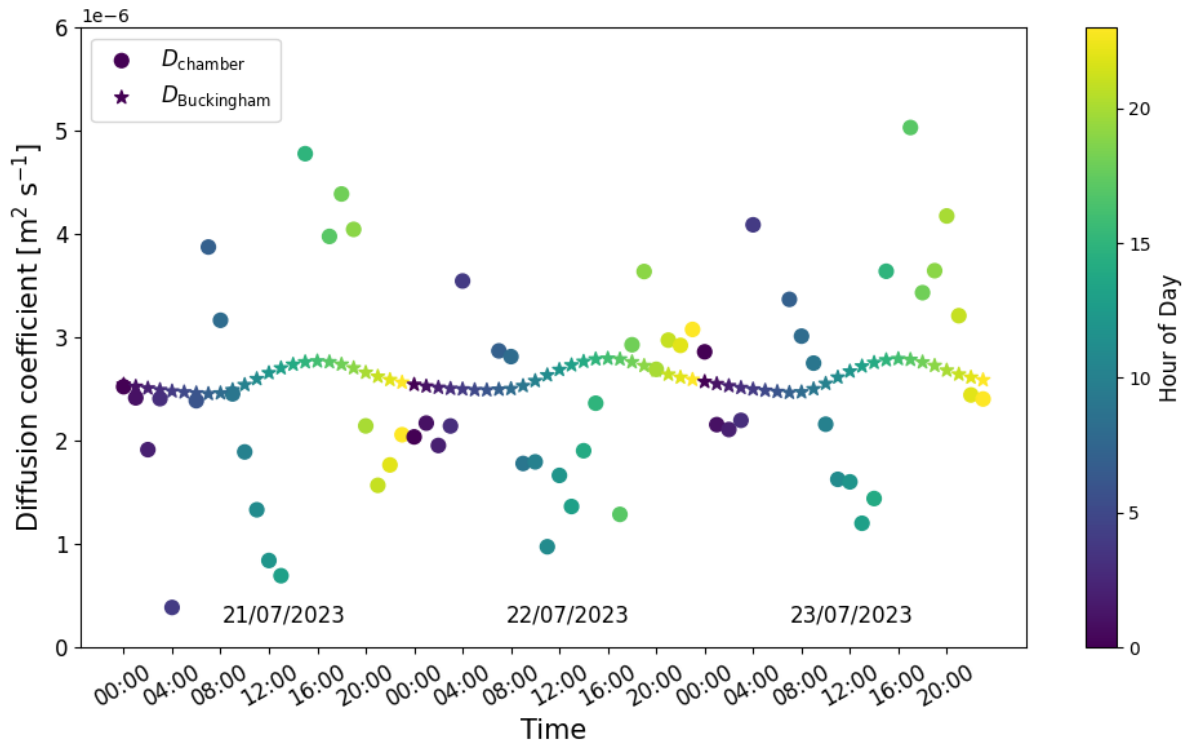

**Figure 1.** Comparison between  $D_{chamber}$  and  $D_{Buckingham}$

2. "Also, I want to see the relations among measured  $CO_2$  flux,  $CO_2$  conc gradient, and modeled diffusion coefficient."

The relations between measured  $CO_2$  flux vs. modelled diffusion coefficient and measured  $CO_2$  flux vs.  $CO_2$  concentration gradient are presented in Fig. 2. From the two correlations, it is shown that flux is mainly driven by  $CO_2$  concentration gradient (as expected).

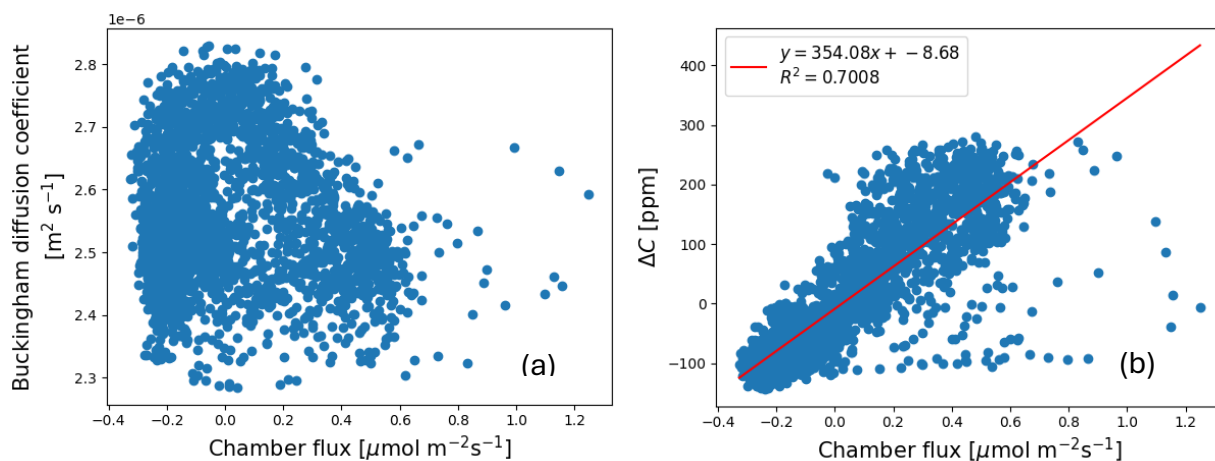

**Figure 2.** Relation between measured  $CO_2$  flux vs. Buckingham diffusion coefficient (a) and vs.  $CO_2$  concentration gradient (b).

## References

Buckingham, E. (1904), Contributions to Our Knowledge of the Aeration of Soils, U.S. Dept. of Agriculture, Bureau of Soils, Washington, D. C.

Sánchez-Cañete, E. P., Scott, R. L., van Haren, J., & Barron-Gafford, G. A. (2017). Improving the accuracy of the gradient method for determining soil carbon dioxide efflux. *Journal of Geophysical Research: Biogeosciences*, 122(1), 50–64. <https://doi.org/10.1002/2016JG003530>

Sánchez-Cañete, E. P., Barron-Gafford, G. A., & Chorover, J. (2018). A considerable fraction of soil-respired CO<sub>2</sub> is not emitted directly to the atmosphere. *Scientific reports*, 8(1), 13518. <https://doi.org/10.1038/s41598-018-29803-x>
